# Supplementary material for: Liver-Targeted AAV8 Gene Therapy Ameliorates Skeletal and Cardiovascular Pathology in a Mucopolysaccharidosis IVA Murine Model
Source: PubMed Central journal article supplement — Mol Ther Methods Clin Dev. 2020 May 22;18:50–61. doi: 10.1016/j.omtm.2020.05.015 (PMC7301175; doi:10.1016/j.omtm.2020.05.015), 2020-05-22

**OMTM, Volume 18**

**Supplemental Information**

**Liver-Targeted AAV8 Gene Therapy Ameliorates  
Skeletal and Cardiovascular Pathology  
in a Mucopolysaccharidosis IVA Murine Model**

**Kazuki Sawamoto, Subha Karumuthil-Melethil, Shaukat Khan, Molly Stapleton, Joseph T. Bruder, Olivier Danos, and Shunji Tomatsu**

Supplemental Figure 1.

**A**

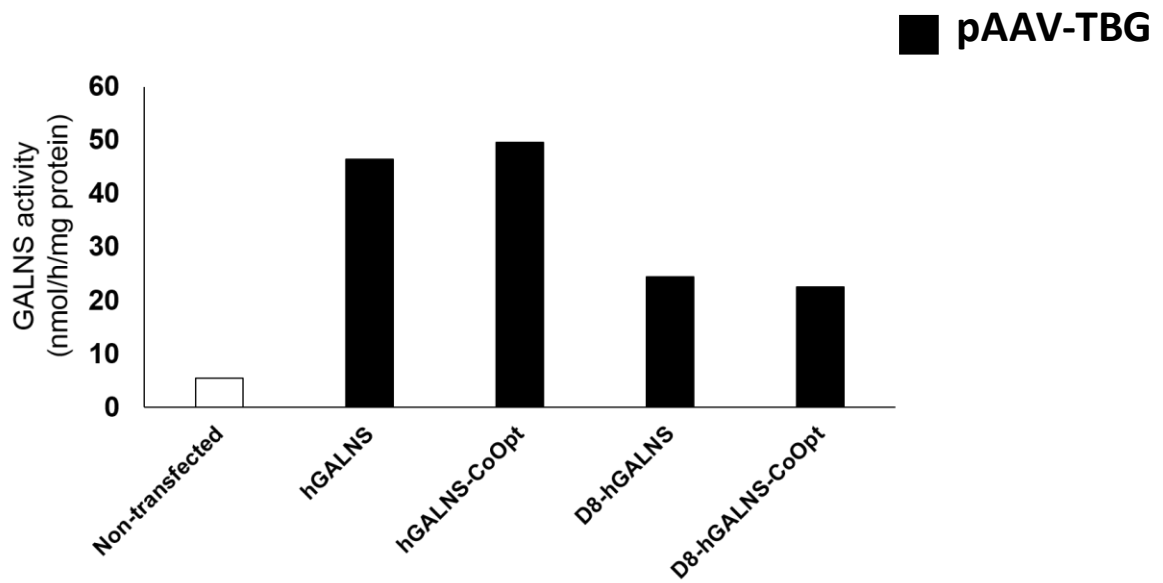

**B**

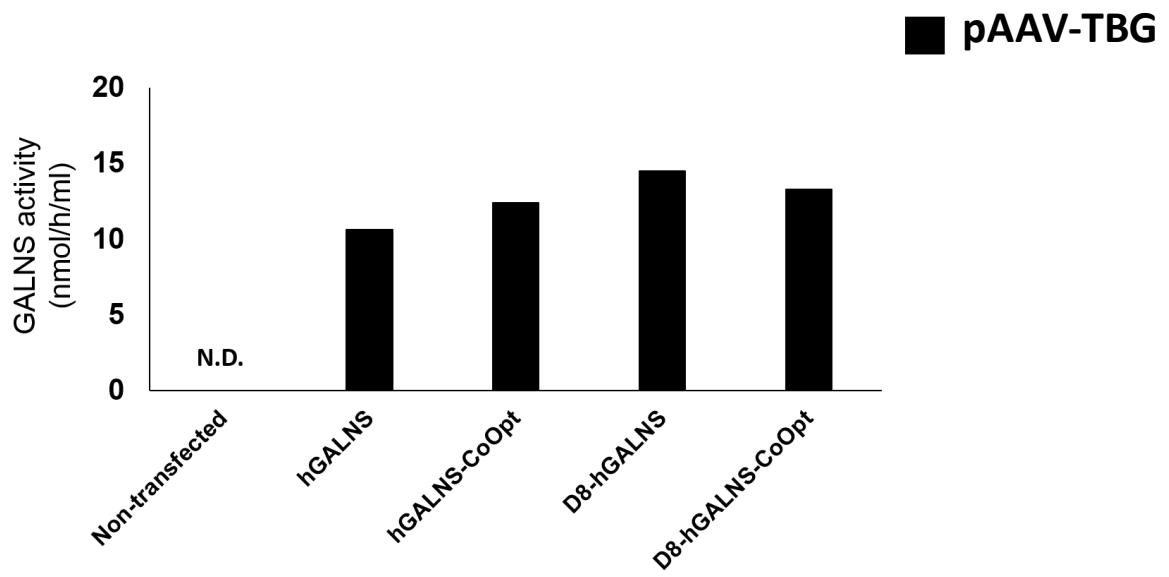

**Supplemental Figure 2.**

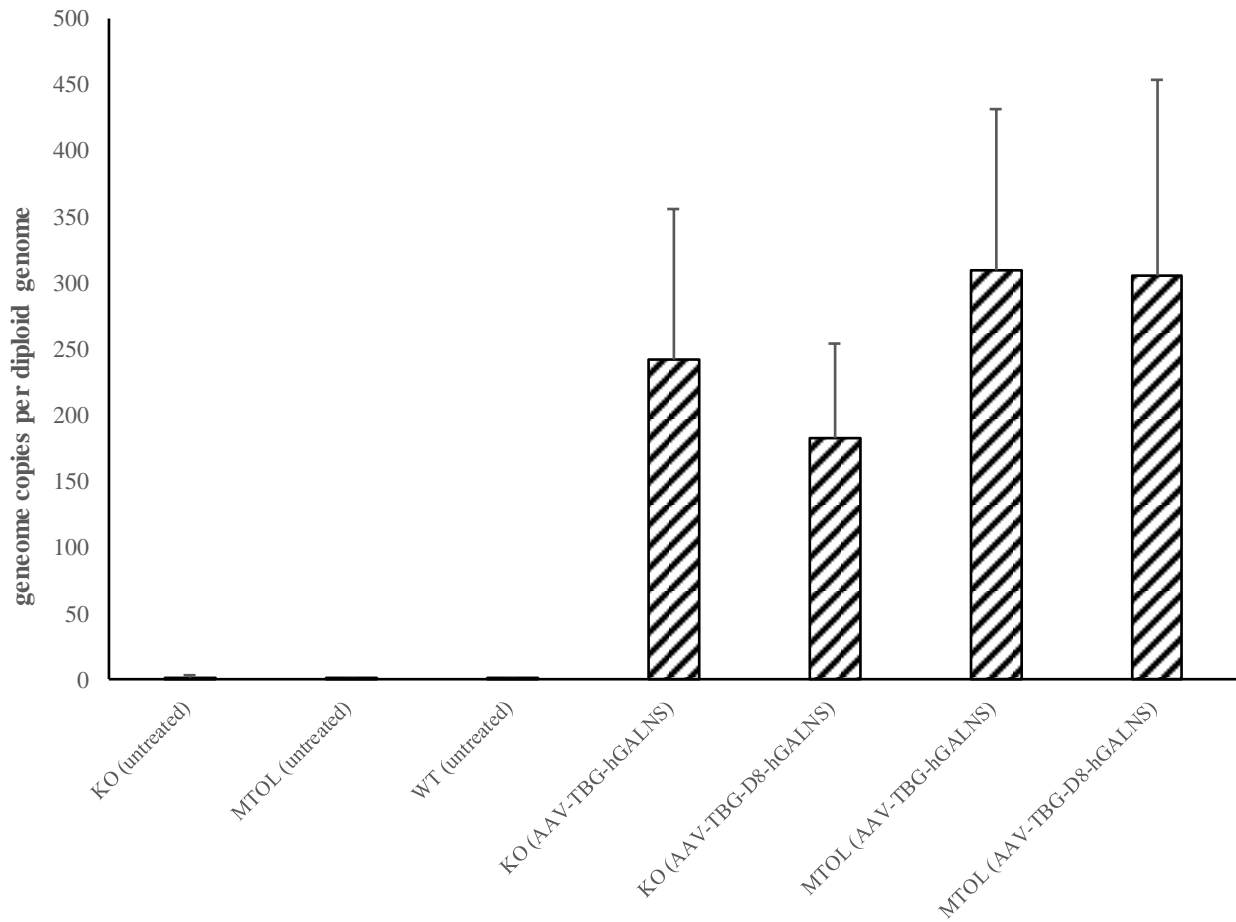

| <b>Group</b>                    | <b>AAV vector genome copies per diploid genome</b> |
|---------------------------------|----------------------------------------------------|
| <b>KO (untreated)</b>           | <b>1.57 ± 1.21 (n = 6)</b>                         |
| <b>MTOL (untreated)</b>         | <b>0.083 ± 0.12 (n = 4)</b>                        |
| <b>WT (untreated)</b>           | <b>0.063 ± 0.11 (n = 6)</b>                        |
| <b>KO (AAV-TBG-hGALNS)</b>      | <b>242.23 ± 114.08 (n = 7)</b>                     |
| <b>KO (AAV-TBG-D8-hGALNS)</b>   | <b>182.36 ± 71.85 (n = 6)</b>                      |
| <b>MTOL (AAV-TBG-hGALNS)</b>    | <b>309.51 ± 112.14 (n = 5)</b>                     |
| <b>MTOL (AAV-TBG-D8-hGALNS)</b> | <b>305.36 ± 147.82 (n = 4)</b>                     |

Supplemental Figure 3.

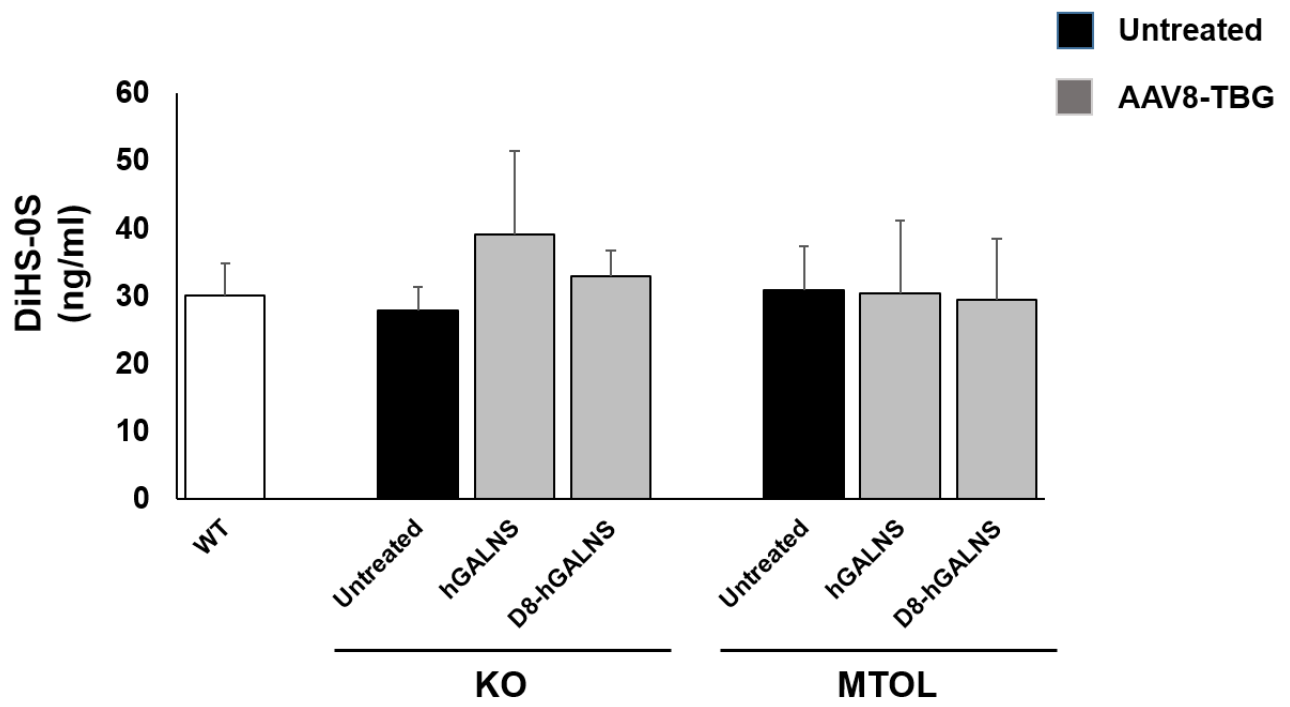

Supplemental Figure 4.

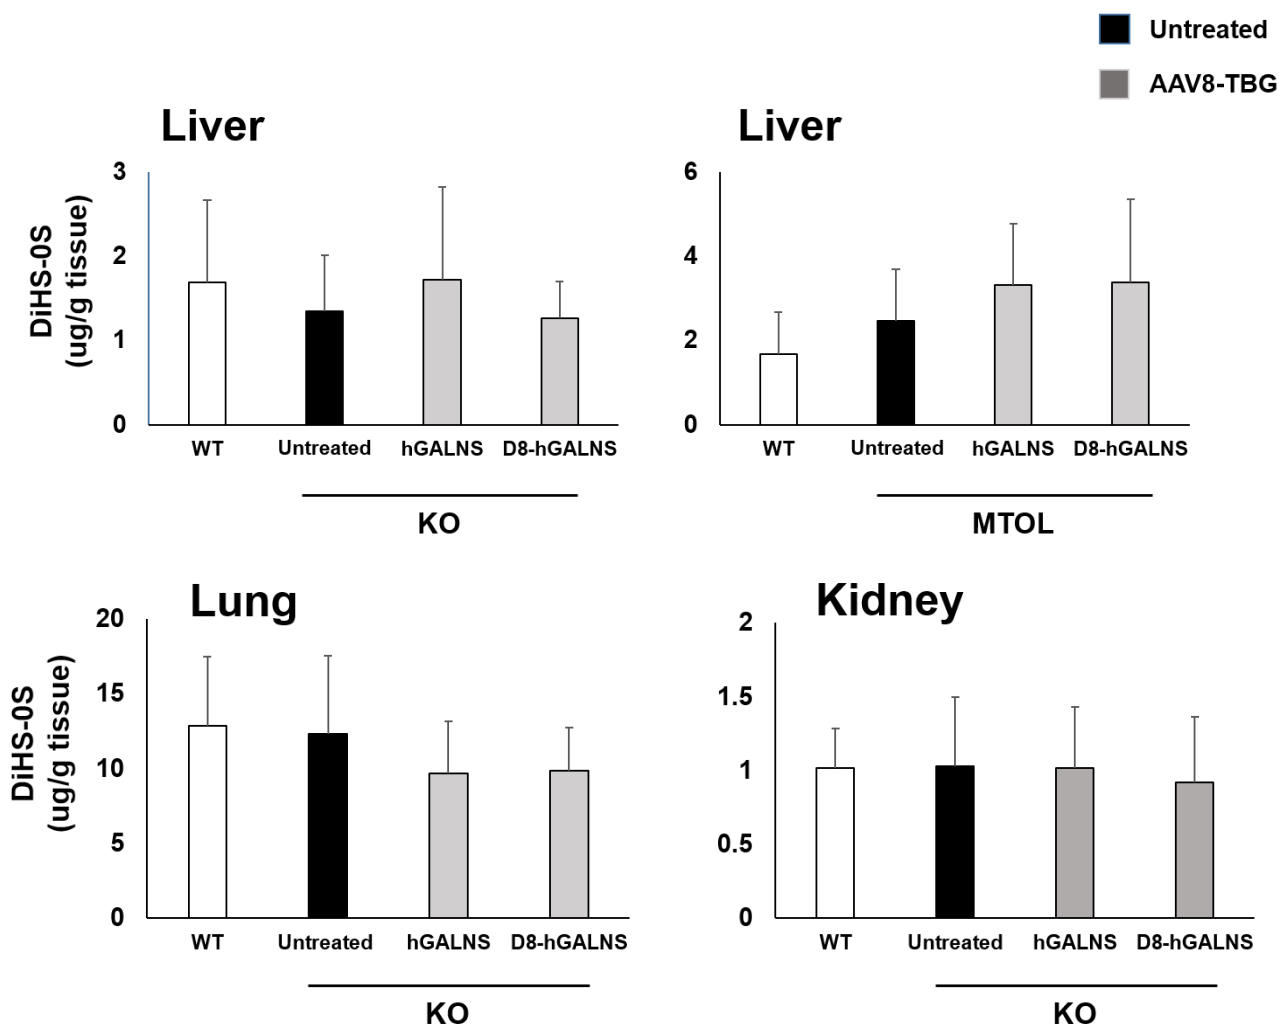

Supplemental Figure 5.

**A**

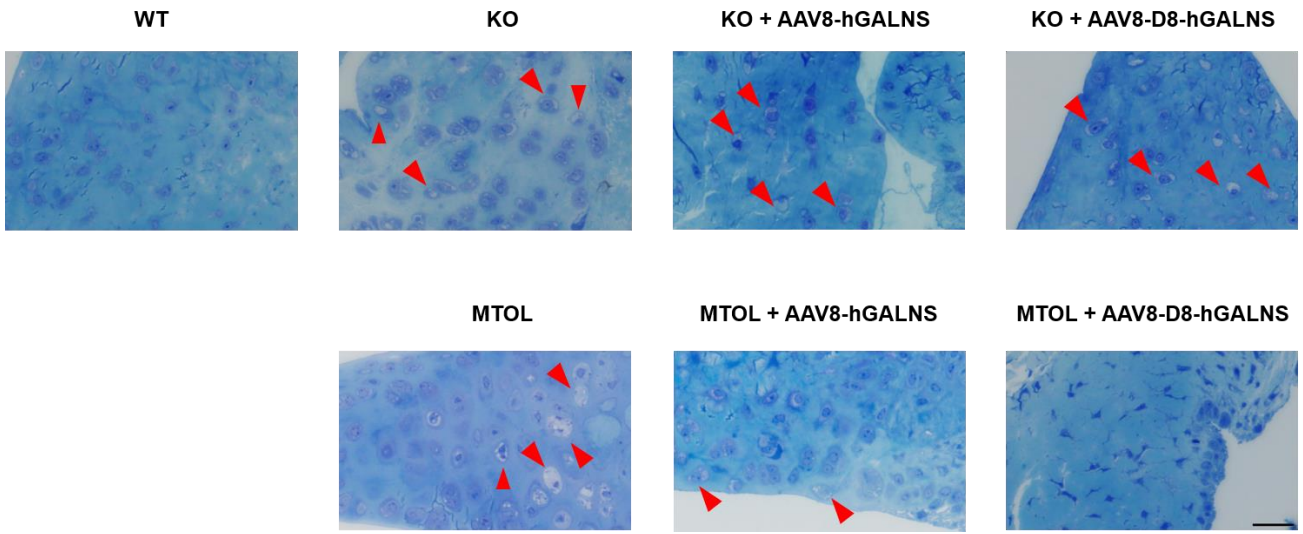

**B**

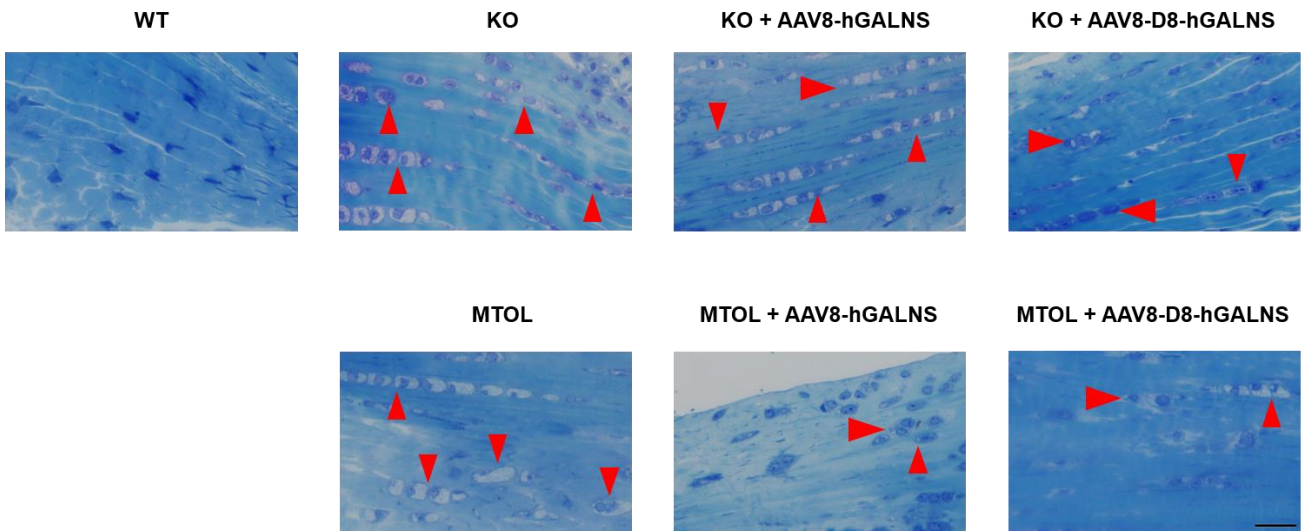

Supplemental Figure 6.

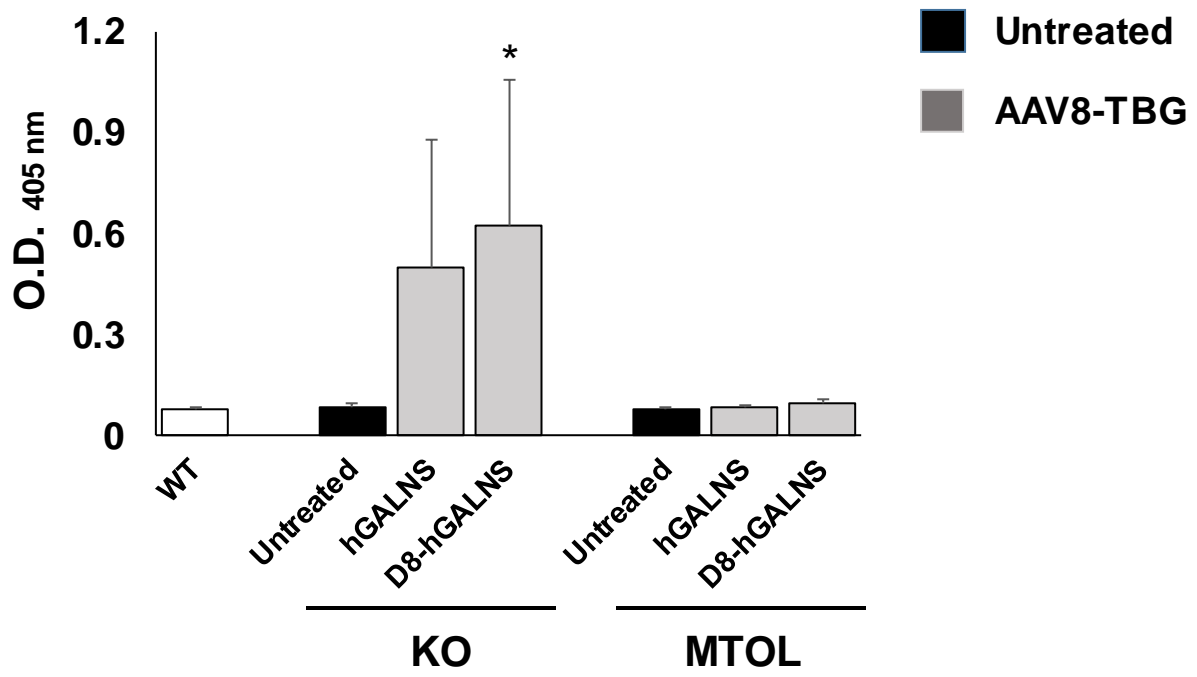

Supplement: mmc1.pdf [file mmc1.pdf]
